# Supplementary material
Source: publisher site journal article supplement (https://www.spandidos-publications.com/2564/downloadSupplementary)
Supplement: Supplementary file 1 [file downloadSupplementary]

## Sheet: Sheet1
Table S1 The detailed clinical data of dataset GSE62254
Tumor ID	Accession number	Sex	Age	Lauren	Status 0=alive,1=dead	OS (months)
1	GSM1523979	M	78	intestinal	1	9.43333
3	GSM1524024	M	61	diffuse	1	89.4333
4	GSM1524030	F	46	diffuse	1	31.3333
9	GSM1524062	F	40	diffuse	1	70.2
11	GSM1523929	F	67	intestinal	0	88.3333
12	GSM1523934	M	70	intestinal	1	12.8
14	GSM1523951	M	66	diffuse	1	53.0333
16	GSM1523959	M	54	intestinal	1	17.4333
17	GSM1523965	M	52	diffuse	1	11.4667
18	GSM1523973	M	62	diffuse	0	87.2667
19	GSM1523978	F	67	diffuse	1	16.2333
20	GSM1523986	M	72	diffuse	0	86.8
21	GSM1523989	M	46	intestinal	0	86.7
22	GSM1523994	M	63	intestinal	0	86.3667
23	GSM1523998	M	59	intestinal	1	21.2333
25	GSM1524003	F	60	intestinal	0	85.9333
26	GSM1524004	M	58	diffuse	1	5.93333
28	GSM1524008	M	39	diffuse	1	10.8333
29	GSM1524010	F	73	diffuse	1	19.7
30	GSM1524012	M	64	diffuse	0	85.2333
31	GSM1524016	M	24	diffuse	1	27.8
32	GSM1524017	M	67	intestinal	0	85.0333
34	GSM1524019	M	70	diffuse	1	8.33333
35	GSM1524020	M	51	intestinal	0	84.3
36	GSM1524021	F	56	diffuse	1	12.9333
38	GSM1524022	F	65	diffuse	1	8.03333
39	GSM1524023	F	77	intestinal	0	83.8333
42	GSM1524026	F	52	diffuse	0	83.6
45	GSM1524027	M	61	diffuse	1	59.7
47	GSM1524028	M	72	intestinal	1	47.7
49	GSM1524029	F	50	diffuse	1	31.1
50	GSM1524031	M	55	intestinal	0	82
51	GSM1524032	F	70	intestinal	1	77.2
52	GSM1524033	F	67	intestinal	0	80.8333
53	GSM1524034	M	65	intestinal	1	44.0667
55	GSM1524036	M	70	intestinal	0	79.9333
56	GSM1524037	M	72	intestinal	1	23.4333
57	GSM1524038	M	74	diffuse	1	8.63333
58	GSM1524039	M	72	diffuse	1	12.0667
60	GSM1524040	F	55	diffuse	1	36.1667
61	GSM1524041	M	56	intestinal	0	77.3333
62	GSM1524042	F	62	diffuse	1	10.8333
63	GSM1524043	M	60	diffuse	1	16.8333
64	GSM1524044	M	80	intestinal	1	22.8667
68	GSM1524045	M	33	intestinal	0	89.1333
75	GSM1524046	F	59	diffuse	0	88.0333
77	GSM1524047	M	74	diffuse	0	69.8667
78	GSM1524048	M	67	intestinal	1	46.8
79	GSM1524049	M	62	intestinal	0	87.8
80	GSM1524050	M	66	intestinal	1	57.1333
81	GSM1524051	F	51	diffuse	0	87.2667
82	GSM1524068	F	71	intestinal	0	92.8667
83	GSM1524052	M	74	diffuse	1	13.1667
84	GSM1524053	M	61	intestinal	0	86.9333
85	GSM1524054	M	72	intestinal	0	86.5667
86	GSM1524055	M	54	intestinal	1	37.9333
88	GSM1524056	M	71	intestinal	1	14.1667
89	GSM1524070	M	58	intestinal	0	91.6333
90	GSM1524057	M	80	intestinal	1	15.9333
91	GSM1524058	F	56	intestinal	0	85.4667
93	GSM1524059	M	58	diffuse	0	85.2
94	GSM1524071	M	60	intestinal	0	90.7667
96	GSM1524060	M	56	intestinal	0	84.8333
97	GSM1524061	M	77	intestinal	0	84.6
101	GSM1523919	M	64	intestinal	0	84.1
105	GSM1523920	M	44	intestinal	1	9.33333
106	GSM1523921	M	42	diffuse	0	83.3
107	GSM1523727	M	67	intestinal	0	88.7333
108	GSM1523728	F	68	intestinal	0	88.2333
109	GSM1523729	F	42	diffuse	0	88.2333
112	GSM1523922	M	65	intestinal	1	23.6
113	GSM1523923	M	59	diffuse	1	26.4
114	GSM1523924	M	52	diffuse	0	82.2
115	GSM1523925	F	59	diffuse	1	6.3
116	GSM1523926	M	69	intestinal	0	69.0333
117	GSM1523927	M	46	diffuse	0	80.7667
121	GSM1523930	M	51	intestinal	0	78.5333
124	GSM1523931	F	61	diffuse	0	77.6
128	GSM1523932	F	66	intestinal	1	12.6667
129	GSM1523933	M	74	diffuse	0	75.2667
132	GSM1523935	M	64	diffuse	0	87.4
133	GSM1523936	M	70	diffuse	1	17.5667
134	GSM1523937	M	81	intestinal	1	19.6667
135	GSM1523938	F	53	diffuse	1	5.76667
136	GSM1523939	F	28	diffuse	1	11.2333
137	GSM1523940	M	69	intestinal	1	20.0333
138	GSM1523941	M	70	diffuse	1	4.53333
139	GSM1523942	M	70	intestinal	0	70.2667
140	GSM1523943	F	72	diffuse	1	5.53333
141	GSM1523944	M	71	diffuse	0	69.6333
142	GSM1523945	M	53	diffuse	1	17.5333
143	GSM1523946	M	50	intestinal	0	68.9333
144	GSM1523947	F	74	intestinal	0	68.4333
145	GSM1523948	M	52	diffuse	1	27.4667
146	GSM1523949	F	51	diffuse	1	10.1
148	GSM1523950	M	57	intestinal	0	68.2
150	GSM1523952	F	54	diffuse	0	100.867
151	GSM1523953	M	70	diffuse	0	84.7667
152	GSM1523954	M	62	diffuse	0	100.867
156	GSM1523957	F	37	intestinal	0	100.633
157	GSM1523958	M	56	diffuse	0	100.233
160	GSM1523744	M	69	diffuse	0	105.7
164	GSM1523745	M	68	diffuse	0	105.533
169	GSM1523748	F	68	diffuse	0	104.933
171	GSM1523960	F	70	intestinal	0	99
172	GSM1523961	M	63	intestinal	1	9.5
173	GSM1523962	M	48	diffuse	1	20.1333
175	GSM1523963	F	69	intestinal	1	45.7667
177	GSM1523964	M	61	intestinal	0	98.5333
180	GSM1523966	M	35	diffuse	1	51.8
182	GSM1523967	M	52	diffuse	0	98.4667
185	GSM1523968	F	44	diffuse	1	45.1667
186	GSM1523969	M	69	diffuse	1	17.9
188	GSM1523971	F	45	diffuse	1	13.3
190	GSM1523974	M	61	intestinal	0	98.2333
192	GSM1523975	M	67	diffuse	1	7.2
197	GSM1523977	M	63	diffuse	1	1
202	GSM1523981	M	51	diffuse	0	97.2
205	GSM1523983	M	61	diffuse	1	10.1
206	GSM1523984	M	57	diffuse	0	96.9667
207	GSM1523918	M	62	diffuse	1	28.1333
212	GSM1523987	F	30	diffuse	1	18.2667
225	GSM1523990	M	40	diffuse	1	14.1667
226	GSM1523991	F	63	intestinal	0	95.2
227	GSM1523992	F	70	diffuse	1	20.1333
235	GSM1523765	F	52	diffuse	1	14.2
237	GSM1523996	F	75	diffuse	1	35.2
238	GSM1523997	F	72	diffuse	1	25.2
240	GSM1523999	M	66	intestinal	0	93.8667
241	GSM1524000	F	69	diffuse	0	93.8667
244	GSM1523768	M	52	intestinal	1	24.2333
246	GSM1524001	M	58	intestinal	0	93.6333
253	GSM1523769	F	71	diffuse	1	13.7333
256	GSM1523771	F	62	diffuse	1	12.6667
263	GSM1523772	F	58	diffuse	1	10.0333
268	GSM1523773	F	75	diffuse	1	4.33333
269	GSM1523774	M	56	intestinal	0	97.7
270	GSM1523775	F	77	diffuse	0	97.6
275	GSM1523776	M	48	diffuse	0	97.4667
282	GSM1524005	M	71	intestinal	1	9.46667
287	GSM1524006	F	41	diffuse	1	26.2667
288	GSM1524007	F	48	diffuse	1	10.3667
299	GSM1524009	F	60	diffuse	1	65
301	GSM1524011	F	63	intestinal	0	90.2
311	GSM1524013	M	63	intestinal	0	89.9
318	GSM1524014	F	66	intestinal	1	11.3333
321	GSM1523777	M	60	intestinal	0	92.9333
322	GSM1523778	F	56	diffuse	0	92.6333
323	GSM1523779	F	77	diffuse	0	92.6
324	GSM1523780	F	84	intestinal	1	16.4
325	GSM1523781	F	37	intestinal	1	2.93333
326	GSM1523782	M	63	intestinal	1	4.4
327	GSM1523783	F	55	diffuse	0	91.9333
328	GSM1523784	F	44	diffuse	0	91.3
330	GSM1523786	F	44	diffuse	1	28.4667
331	GSM1523787	F	57	intestinal	0	89.6333
333	GSM1523788	F	42	diffuse	1	8.26667
336	GSM1523789	M	69	diffuse	1	11.8
337	GSM1523790	M	62	intestinal	0	80.9333
338	GSM1523791	M	60	intestinal	0	81.1333
339	GSM1523792	M	55	intestinal	0	80.8
341	GSM1523793	F	82	diffuse	0	80.7333
343	GSM1523794	M	67	diffuse	1	27
346	GSM1523795	M	70	intestinal	0	80.0667
355	GSM1523796	M	53	intestinal	1	57.6333
361	GSM1523797	M	63	intestinal	1	28.2667
369	GSM1523799	M	81	intestinal	0	77.5
372	GSM1523800	M	73	intestinal	0	76.9333
375	GSM1523802	F	70	intestinal	0	76.7667
377	GSM1523804	F	37	diffuse	0	76.7
388	GSM1523806	M	68	intestinal	1	12.7
394	GSM1523807	F	70	intestinal	0	73.7333
395	GSM1523808	M	56	diffuse	0	73.5
396	GSM1523809	M	77	intestinal	0	73.4333
397	GSM1523810	M	66	intestinal	0	73.0667
399	GSM1523811	F	80	intestinal	0	72.8667
401	GSM1523812	M	62	diffuse	0	72.8333
402	GSM1523813	M	70	diffuse	0	72.8333
405	GSM1523814	M	68	intestinal	0	72.7333
414	GSM1523816	M	66	intestinal	0	72.0667
415	GSM1523817	M	73	diffuse	1	6.23333
416	GSM1523818	F	66	diffuse	1	9.83333
419	GSM1523819	F	77	intestinal	1	10.1
421	GSM1523821	M	64	intestinal	0	71.1
422	GSM1523822	M	66	intestinal	0	70.9667
423	GSM1523823	F	64	intestinal	0	70.9
424	GSM1523824	M	64	intestinal	0	70.6667
425	GSM1523825	M	69	intestinal	1	4
426	GSM1523826	M	74	intestinal	1	2.7
427	GSM1523827	F	36	diffuse	0	70.0333
428	GSM1523828	M	72	intestinal	1	5.86667
430	GSM1523829	M	68	intestinal	0	69.8333
431	GSM1523830	M	59	intestinal	1	53.4333
432	GSM1523831	M	68	diffuse	1	30.9
433	GSM1523832	M	62	intestinal	1	17.6667
437	GSM1523833	M	65	diffuse	1	8.86667
438	GSM1523834	F	66	diffuse	1	44.5667
440	GSM1523835	M	54	intestinal	0	69.3
441	GSM1523836	M	56	intestinal	0	69.2333
443	GSM1523838	M	65	intestinal	1	10.3333
444	GSM1523839	M	57	diffuse	0	69.1333
445	GSM1523840	M	78	diffuse	1	22.8333
447	GSM1523842	M	70	diffuse	1	48.7333
448	GSM1523843	F	65	diffuse	1	25.8667
450	GSM1523844	M	54	intestinal	0	68.9
451	GSM1523845	F	77	diffuse	1	9.66667
455	GSM1523846	M	63	diffuse	0	68.3667
456	GSM1523847	F	31	intestinal	0	68.1333
457	GSM1523848	M	68	diffuse	0	68.1333
459	GSM1523849	M	65	intestinal	1	28.0333
460	GSM1523850	M	38	diffuse	1	36.4
465	GSM1523851	F	77	intestinal	0	67.2333
469	GSM1523852	M	55	intestinal	1	31
470	GSM1523853	M	68	intestinal	0	66.7333
471	GSM1523854	M	69	diffuse	0	66.7333
476	GSM1523855	M	77	intestinal	1	21.9333
477	GSM1523856	F	51	diffuse	0	66.2
480	GSM1523857	F	75	intestinal	1	14.4333
482	GSM1523858	F	42	diffuse	1	17.1
483	GSM1523859	M	67	intestinal	0	53.1333
488	GSM1523861	M	64	intestinal	0	64.8
489	GSM1523862	M	41	diffuse	1	21
501	GSM1523864	M	52	intestinal	0	63.9667
502	GSM1523865	M	70	intestinal	0	63.7
503	GSM1523866	F	86	intestinal	1	4.36667
505	GSM1523867	M	54	intestinal	1	33.2667
514	GSM1523869	F	67	diffuse	0	62.5333
516	GSM1523870	M	75	intestinal	0	62.4667
517	GSM1523871	F	70	intestinal	0	62.3667
518	GSM1523872	F	61	diffuse	1	15.0333
519	GSM1523873	M	57	diffuse	1	24.0333
520	GSM1523874	F	72	intestinal	0	62.1
522	GSM1523875	M	79	intestinal	1	8.46667
523	GSM1523876	M	76	intestinal	0	61.9
524	GSM1523877	M	65	intestinal	1	13.1
525	GSM1523878	M	56	intestinal	0	61.8667
528	GSM1523879	M	63	intestinal	0	61.1667
529	GSM1523880	F	54	diffuse	0	60.9667
532	GSM1523881	M	74	intestinal	1	14.9
533	GSM1523882	M	36	diffuse	0	60.7
538	GSM1523884	M	50	diffuse	0	60.4333
540	GSM1523885	F	53	diffuse	0	60.2333
541	GSM1523886	M	49	diffuse	1	5.6
542	GSM1523887	M	46	diffuse	0	60.2
544	GSM1523888	M	52	intestinal	0	59.9
547	GSM1523889	M	74	intestinal	0	59.6667
550	GSM1523890	F	33	diffuse	0	59.5667
551	GSM1523891	F	53	intestinal	0	59.5667
553	GSM1523892	M	59	intestinal	0	59.4667
554	GSM1523893	M	74	intestinal	1	20.1
556	GSM1523894	M	56	intestinal	1	35.7667
557	GSM1523895	M	66	intestinal	0	59.0333
559	GSM1523896	M	51	intestinal	1	28.0333
560	GSM1523897	F	78	intestinal	0	58.8667
561	GSM1523898	M	60	intestinal	0	58.8333
566	GSM1523899	F	60	intestinal	0	58.0667
571	GSM1523901	F	65	intestinal	0	57.4667
584	GSM1523903	M	60	intestinal	1	39.8
586	GSM1523904	M	56	intestinal	0	55.3667
588	GSM1523905	M	66	diffuse	0	55.3
589	GSM1523906	M	53	diffuse	0	55.3
592	GSM1523908	F	44	diffuse	0	55.0667
595	GSM1523909	M	74	diffuse	0	54.5333
596	GSM1523910	M	53	diffuse	0	54.3333
603	GSM1523911	F	72	intestinal	1	21.8333
